# Supplementary material for: Development of Novel Dengue NS1 Multiplex Lateral Flow Immunoassay to Differentiate Serotypes in Serum of Acute Phase Patients and Infected Mosquitoes
Source: PubMed Central journal article supplement (PMC8931297; doi:10.3389/fimmu.2022.852452), 2022-03-04
Supplement: DataSheet_1.pdf [file DataSheet_1.pdf]

## *Supplementary Material*

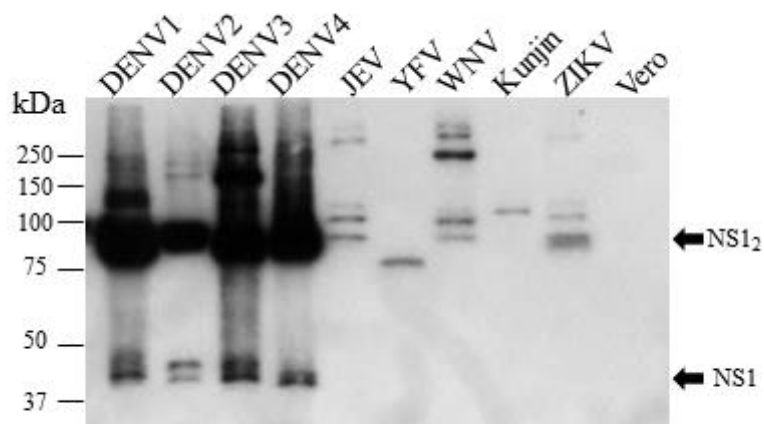

**Supplementary Figure 1.** Detection of NS1 antigen from the various flaviviruses in the supernatant of infected Vero cells using monoclonal antibody D<sub>2</sub> 8-1 (flavivirus-group) against NS1 proteins.

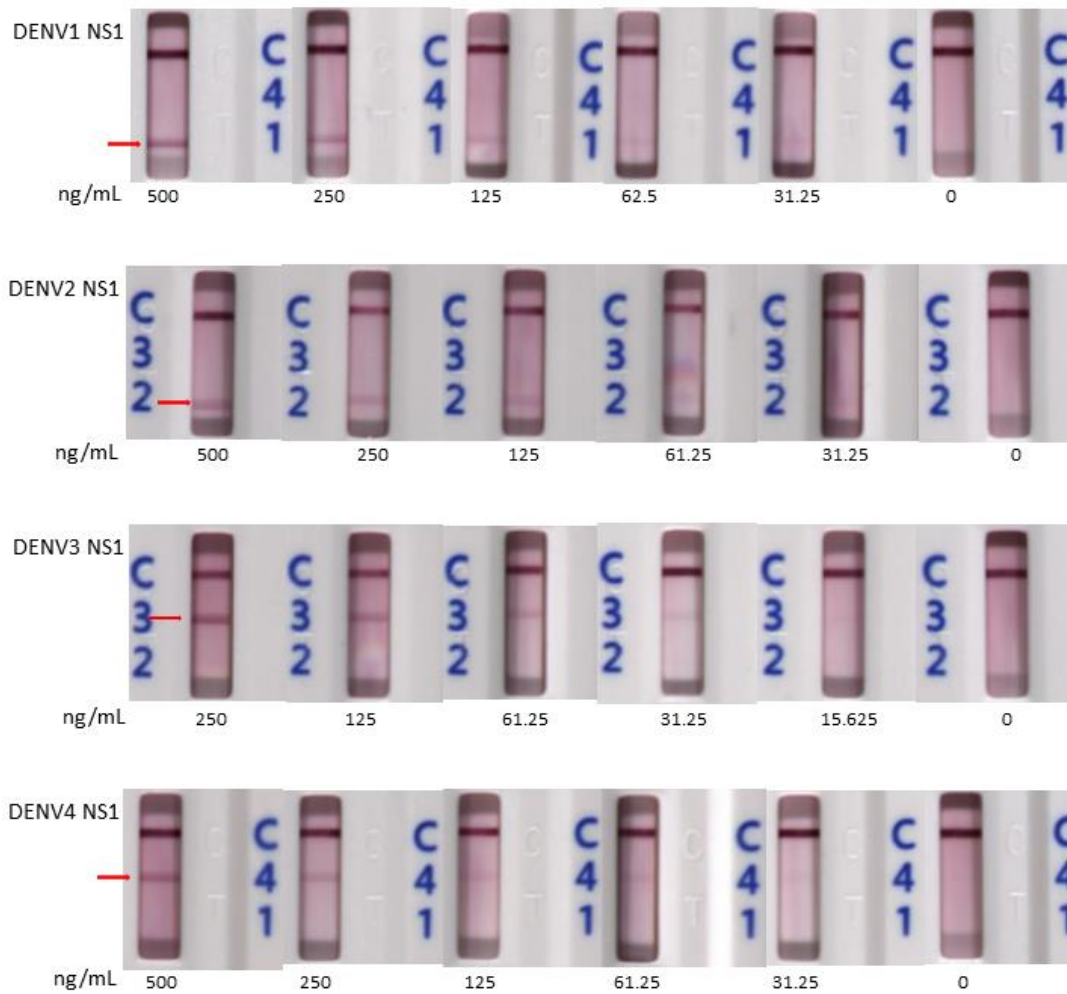

**Supplementary Figure 2.** Detection limits of the proposed DENV serotype NS1 multiplex LFIA chromatographic detection system using solutions containing immunoaffinity-purified DENV NS1 proteins. The limit of detection of NS1 multiplex LFIA was 31.25 ng/mL for DENV1, 31.25 ng/mL for DENV2, 15.625 ng/mL for DENV3, and 31.25 ng/mL for DENV4.

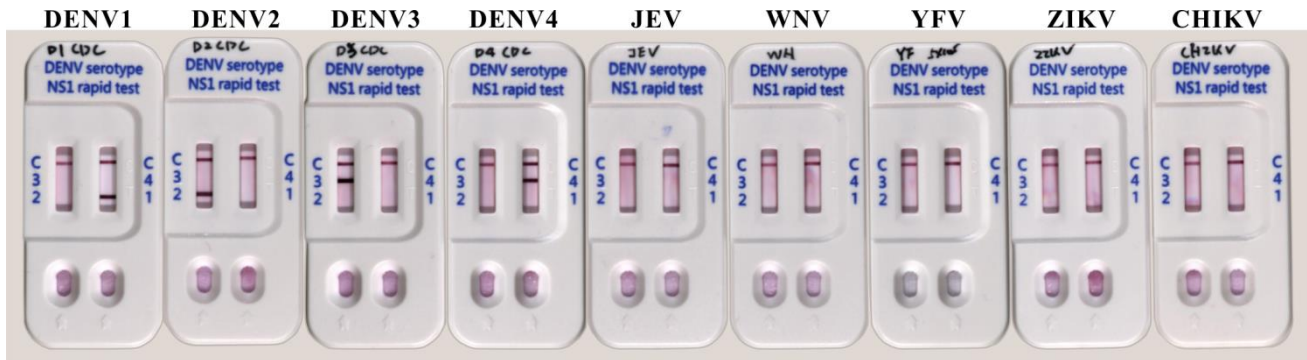

**Supplementary Figure 3.** Cross-reactivity of DENV serotype NS1 multiplex LFIA. Photographs showing DENV serotype NS1 multiplex LFIA using cell culture supernatant from Vero cells infected with DENV1, 2, 3, or 4 or JEV, ZIKV, WNV, YFV, or CHIKV.

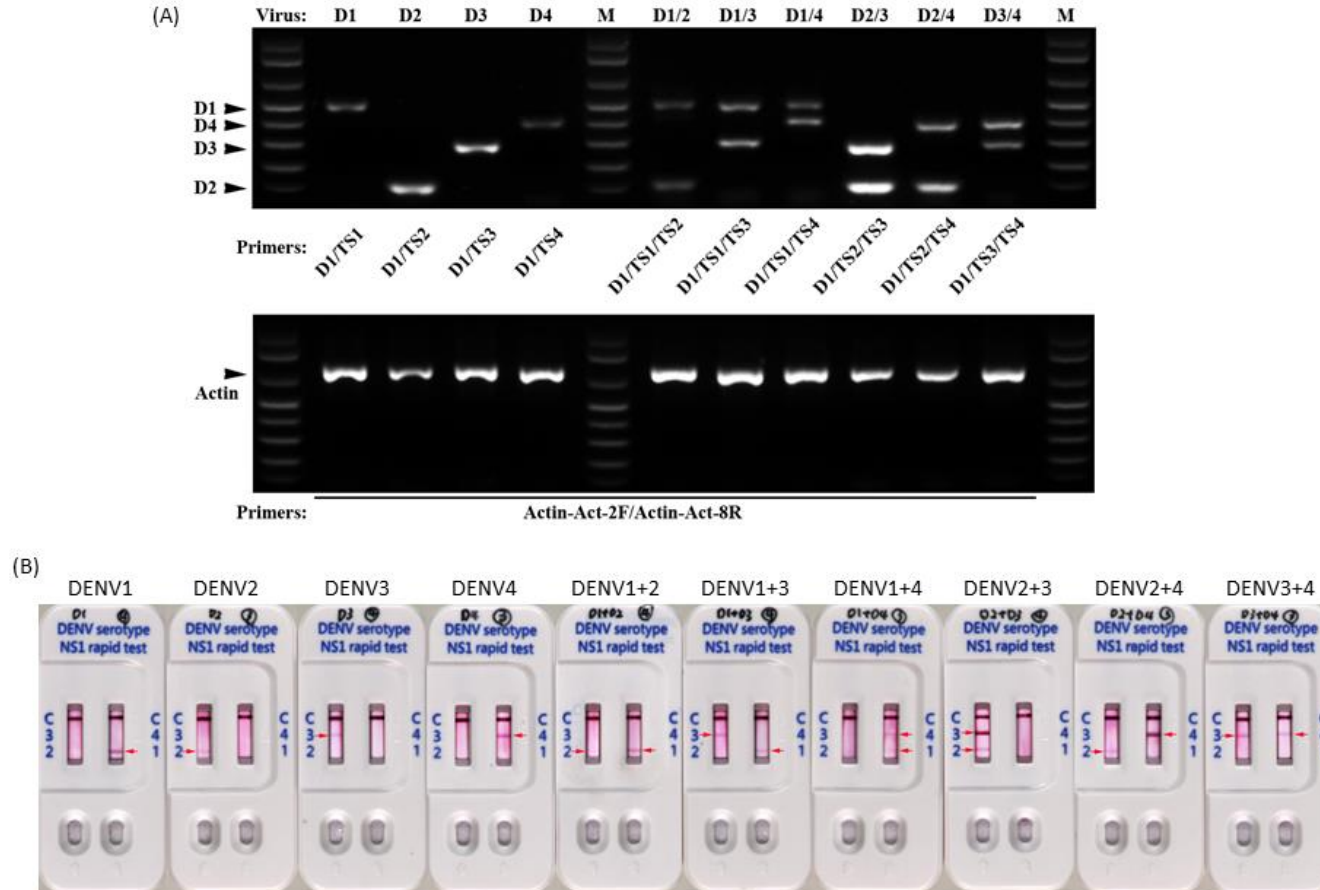

**Supplementary Figure 4.** Samples of individual dengue virus mono-infection (D1, D2, D3, and D4) and co-infection (D1+D2, D1+D3, D1+D4, D2+D3, D2+D4, and D3+D4) mosquitoes tested using dengue serotype-specific RT-PCR and the proposed DENV serotype NS1 multiplex LFIA. (A) RNA reversed transcribed into cDNA from dengue virus mono-infected and co-infected mosquitoes was subjected to PCR using dengue serotype specific primers with actin as an internal control. DENV1 amplicon size: 482bp, DENV2 amplicon size: 119bp, DENV3 amplicon size: 290bp, DENV4 amplicon size: 392bp, and actin amplicon size: 660bp. The amplification PCR products were analyzed using 1% agarose gel electrophoresis with ethidium bromide. (B) The same individual virus infected-mosquitoes were homogenized with 1%NP40-PBS buffer, after which the supernatants were tested using the proposed DENV serotype NS1 multiplex LFIA. The results were read by naked eye at 15 min.

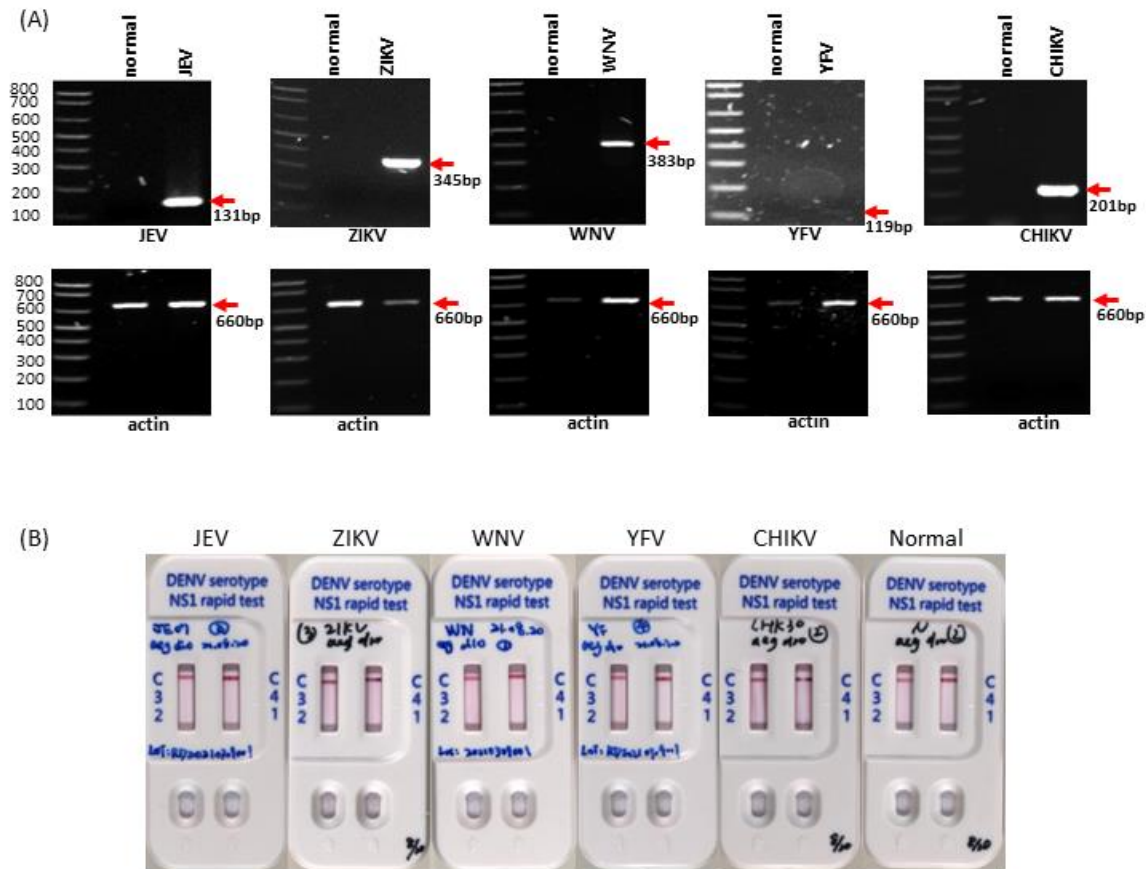

**Supplementary Figure 5.** Samples of individual JEV, ZIKV, YFV, and CHIKV infected mosquitoes tested using specific PCR and the proposed DENV serotype NS1 multiplex LFIA. (A) RNA Reversed transcribed into cDNA from JEV-, ZIKV-, YFV-, and CHIKV-infected individual mosquitoes was subjected to PCR using specific primers and with actin as an internal control. YFV amplicon size: 119bp, WNV amplicon size: 383bp, JEV amplicon size: 131bp, ZIKV amplicon size: 345bp, CHIKV amplicon size: 201bp, and actin amplicon size: 660bp. The amplification PCR products were analyzed using 1% agarose gel electrophoresis with ethidium bromide (B). The same individual virus infected-mosquitoes were homogenized with 1% NP40-PBS buffer, whereupon the supernatants were tested using the proposed DENV serotype NS1 multiplex LFIA. The results were read by the naked eye at 15 mi.

**Supplementary Table 1.** Primer sequences for dengue virus serotype-specific RT-PCR

| Primers | Sequence (5' to 3')                | Serotype       | Genomic region | PCR Size (bp) | Reference |
|---------|------------------------------------|----------------|----------------|---------------|-----------|
| D1      | 5'-TCAATATGCTGAAACGCGCGAGAAACCG-3' | DENV (all)     | 134-161        |               | (1)       |
| TS1     | 5'-CGTCTCAGTGATCCGGGGG-3'          | DENV1: D1- TS1 | 568-586        | 482           |           |
| TS2     | 5'-CGCCACAAGGGCCATGAACAG-3'        | DENV2: D1- TS2 | 232-252        | 119           |           |
| TS3     | 5'-TAACATCATCATGAGACAGAGC-3'       | DENV3: D1- TS3 | 400-421        | 290           |           |
| TS4     | 5'-CTCTGTTGTCTTAAACAAGAGA-3'       | DENV4: D1- TS4 | 506-527        | 392           |           |

**Supplementary Table 2.** Primer sequences for flaviviruses and Chikungunya virus RT-PCR

| Primers      | Sequence (5' to 3')                                                           | GeneBank reference no.               | Genomic region | PCR Size (bp). | Reference       |
|--------------|-------------------------------------------------------------------------------|--------------------------------------|----------------|----------------|-----------------|
| YF-V-F       | GTATTCTGTGGATGCTGACC                                                          | NC 002031                            | 10312-10331    | 119            | (2)             |
| YF-V-R       | TATCCCGGTTTCAGGTTGTG                                                          |                                      | 10412-10431    |                |                 |
| WN-F         | TYGTGTTGGCTCTYTTGGCGTTYTT                                                     | AY532665                             | 233-257        | 383            | (3)             |
| WN-R         | CAGCMGMCAGSACTGGACAYTCATA                                                     |                                      | 640-616        |                |                 |
| JE-5941      | GAAACCCATCTCCCATAACC                                                          | JEV/Taiwan/TP0605a/M/2005 (KF667310) | 5914-5933      | 131            | In house primer |
| JE-6053      | AATGGGCTAGGTTACTGTCA                                                          |                                      | 6026-6045      |                |                 |
| ZIKA-ENV-F*  | GCTGGDGCRGACACHGGRAC (2008, original)<br>GCTGGGGCAGACACCGGAACT(2019,modified) | AY532665                             | 1538-1558      | 345            | (4)             |
| ZIKA-ENV-R*  | RTCYACYGCCATYTGGRCTG (2008, original)<br>GTCCACGCCATCTGAGCTG (2019,modified)  |                                      | 1902-1883      |                |                 |
| CHIKV-CK2    | GTCTGTTCTACACAAGTACAC                                                         | FJ807897                             | 11086-11106    | 201            | (5)             |
| CHIKV-CK3    | ACGACACGCATAGCACCAC                                                           |                                      | 11269-11287    |                |                 |
| actin-Act-2F | ATGGTCGGYATGGGNCAGAAGGACTC                                                    | U02933.1                             | 269-294        | 660            | (6)             |
| actin-Act-8R | GATTCATACCCAGGAAGGADGG                                                        |                                      | 951-929        |                |                 |

\*We modified the primer of ZIKV from original established in J clin Microbiol 2008 43(1):96-101.

**Supplementary Reference**

1. Chien L-J, Liao T-L, Shu P-Y, Huang J-H, Gubler DJ, Chang G-JJ. Development of real-time reverse transcriptase PCR assays to detect and serotype dengue viruses. *J Clin Microbiol* (2006) 44(4):1295-304. doi: 10.1128/JCM.44.4.1295-1304.2006
2. Hughes HR, Russell BJ, Mossel EC, Kayiwa J, Lutwama J, Lambert AJ. Development of a Real-Time Reverse Transcription-PCR Assay for Global Differentiation of Yellow Fever Virus Vaccine-Related Adverse Events from Natural Infections. *J Clin Microbiol* (2018) 56(6). doi: 10.1128/JCM.00323-18
3. Lanciotti RS, Kerst AJ, Nasci RS, Godsey MS, Mitchell CJ, Savage HM, et al. Rapid detection of west nile virus from human clinical specimens, field-collected mosquitoes, and avian samples by a TaqMan reverse transcriptase-PCR assay. *J Clin Microbiol* (2000) 38(11):4066-71. doi: 10.1128/JCM.38.11.4066-4071.2000
4. Faye O, Faye O, Dupressoir A, Weidmann M, Ndiaye M, Alpha Sall A. One-step RT-PCR for detection of Zika virus. *J Clin Virol* (2008) 43(1):96-101. doi: 10.1016/j.jcv.2008.05.005
5. Ho Y-J, Wang Y-M, Lu J-w, Wu T-Y, Lin L-I, Kuo S-C, et al. Suramin Inhibits Chikungunya Virus Entry and Transmission. *PLOS One* (2015) 10(7):e0133511. doi: 10.1371/journal.pone.0133511
6. Staley M, Dorman KS, Bartholomay LC, Fernández-Salas I, Farfan-Ale JA, Loroño-Pino MA, et al. Universal primers for the amplification and sequence analysis of actin-1 from diverse mosquito species. *J Am Mosq Control Assoc* (2010) 26(2):214-8. doi: 10.2987/09-5968.1
